# Supplementary material for: Differentially Expressed Genes in the Brain of Aging Mice With Cognitive Alteration and Depression- and Anxiety-Like Behaviors
Source: PubMed Central journal article supplement (PMC7493670; doi:10.3389/fcell.2020.00814), 2020-08-28
Supplement: Presentation_1.pdf [file Presentation_1.pdf]

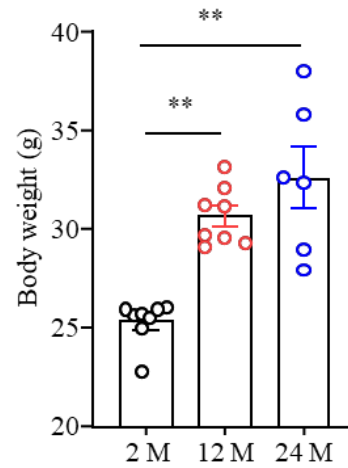

**Supplementary Figure 1.** Body weight changes in aging mice. The body weight of 12- and 24-month old mice was increased significantly as compared to 2-month old mice. Data were shown as mean  $\pm$  SEM.  $n = 8$  for 2- or 12-month mice,  $n = 6$  for 24-month mice. \*\* $P < 0.01$  versus 2-month old mice by one-way ANOVA with repeated measures followed by *post hoc* Tukey test.

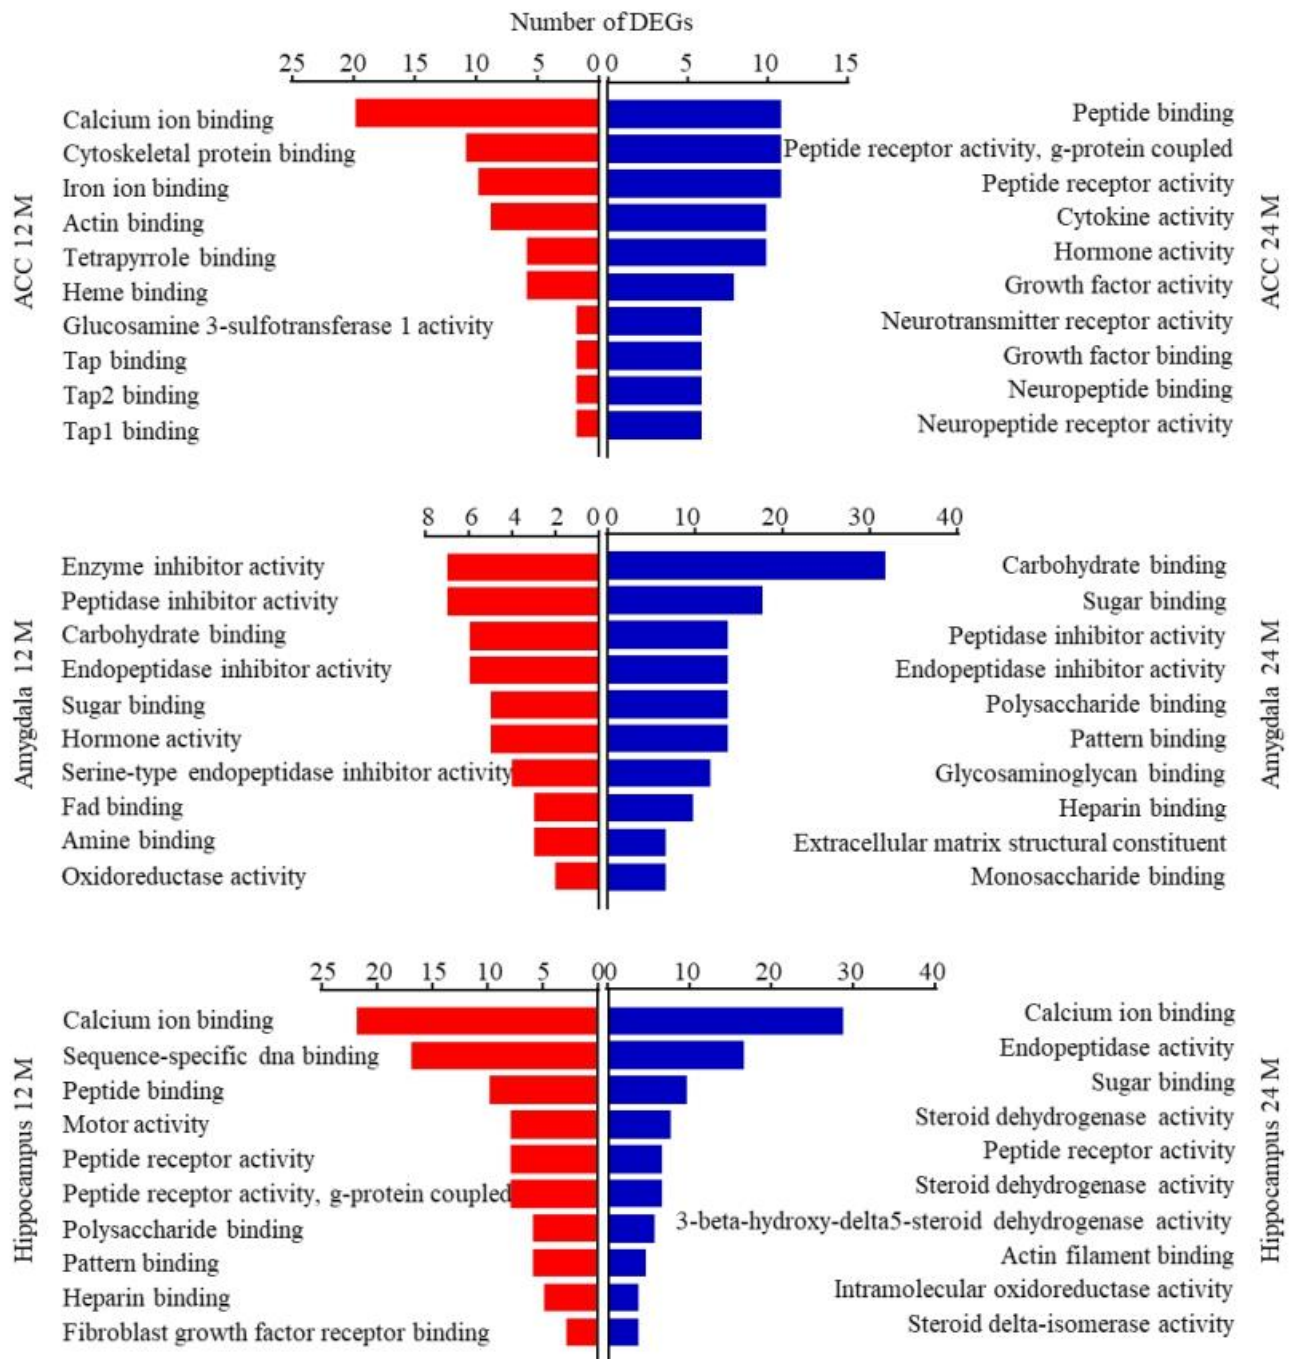

**Supplementary Figure 2.** Functional enrichment analysis of the differentially expressed genes in aging mice. Analysis of the Gene Ontology database showed top 10 molecular functions of the DEGs in the ACC (top), amygdala (middle), and hippocampus (bottom) from 12- and 24-month old mice according to the  $p$ -value of molecular process. The DAVID database was used to do the GO enrichment analysis. Red and blue color bars represent 12- and 24-month old mice, respectively.

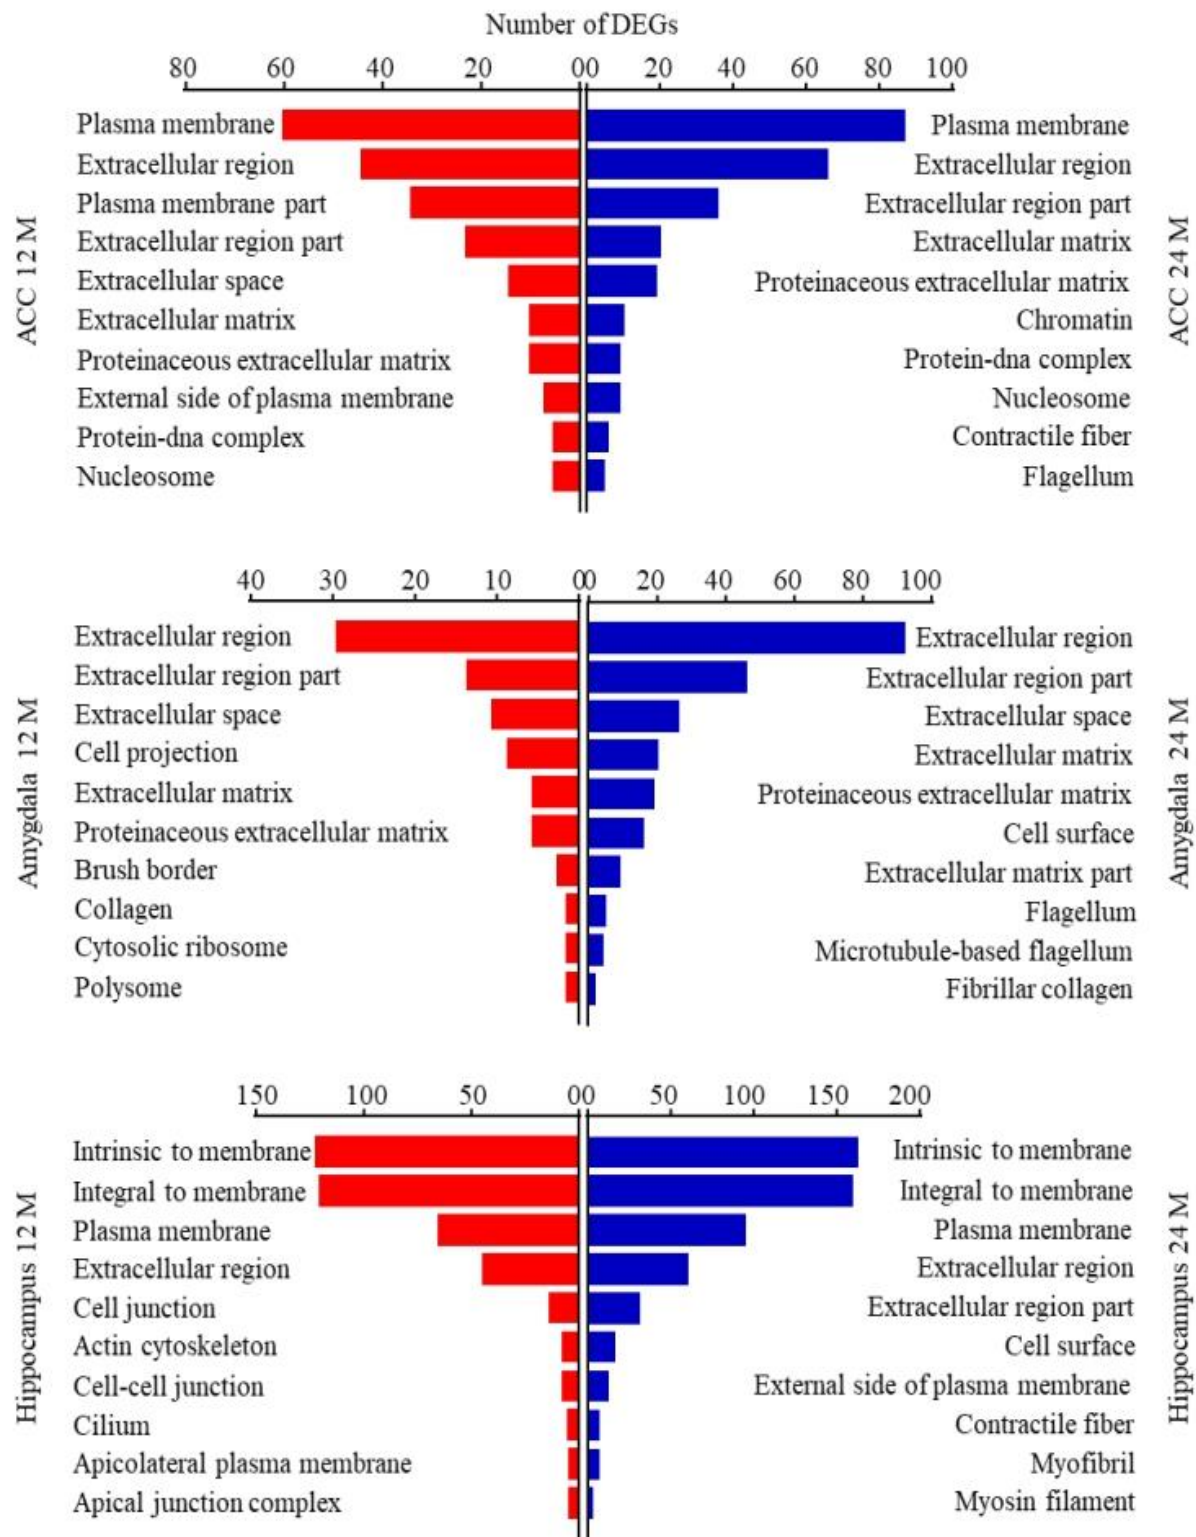

**Supplementary Figure 3.** Functional enrichment analysis of the differentially expressed genes in aging mice. Analysis of the Gene Ontology database showed top 10 cellular components of the DEGs in the ACC (top), amygdala (middle), and hippocampus (bottom) from 12- and 24-month old mice according to the *p*-value of cellular components. The DAVID database was used to do the GO enrichment analysis. Red and blue color bars represent 12- and 24-month old mice, respectively.

**Supplementary Table 1.** Primers for real-time reverse transcription polymerase chain reaction

| Gene names    | Primer sequences        |                         |
|---------------|-------------------------|-------------------------|
|               | Forward                 | Reverse                 |
| <i>Igfbp1</i> | GGGACTCAAGTATTCCTTTCCTG | GCACCTGGACAGCTATATTGAC  |
| <i>Klk6</i>   | CCTGTGCTTGGTTCTTGCTAA   | AAGTGACCTGAGGTGTAGAGG   |
| <i>Defb1</i>  | ATGGAGCCAGGTGTTGGCAT    | TGGGCTTATCTGGTTTACAGGTT |
| <i>Ostn</i>   | CCTGCGTCTTGATGATCTGGT   | TCCATGGGAATACCAAACCGC   |
| <i>Gapdh</i>  | CCACCCAGCAAGGAGAC       | GAAATTGTGAGGGAGATGCT    |

**Supplementary Table 2.** Functional analysis of differentially expressed genes (DEGs) in anterior cingulate cortex (ACC), amygdala and hippocampus of the aging mice

| Gene                                                     | Total | Inflammation | Apoptosis | Oxidative stress | Synaptic plasticity | Glutamate receptor | DNA methylation |
|----------------------------------------------------------|-------|--------------|-----------|------------------|---------------------|--------------------|-----------------|
| Depression-related DEGs in ACC (12 M)                    | 47    | 47           | 45        | 41               | 12                  | 31                 | 44              |
| Depression-related DEGs in ACC (24 M)                    | 96    | 96           | 85        | 81               | 36                  | 64                 | 88              |
| Depression-related DEGs in amygdala (12 M)               | 25    | 25           | 23        | 20               | 9                   | 18                 | 22              |
| Depression-related DEGs in amygdala (24 M)               | 103   | 103          | 90        | 91               | 42                  | 73                 | 94              |
| Anxiety-related DEGs in ACC (12 M)                       | 205   | 205          | -         | 90               | -                   | 70                 | 129             |
| Anxiety related DEGs in ACC (24 M)                       | 124   | 124          | -         | 61               | -                   | 52                 | 74              |
| Anxiety-related DEGs in amygdala (12 M)                  | 110   | 110          | -         | 25               | -                   | 33                 | 61              |
| Anxiety-related DEGs in amygdala (24 M)                  | 128   | 128          | -         | 82               | -                   | 59                 | 86              |
| Cognitive dysfunction-related DEGs in hippocampus (12 M) | 125   | 125          | 97        | 83               | 43                  | 66                 | 94              |
| Cognitive dysfunction-related DEGs in hippocampus (24 M) | 128   | 128          | 101       | 89               | 43                  | 78                 | 94              |

**Supplementary Table 3.** Functional analysis of the genes with differentially expressed isoforms in anterior cingulate cortex (ACC), amygdala and hippocampus of the aging mice

| Gene                                                      | Total | Inflammation | Apoptosis | Oxidative stress | Synaptic plasticity | Glutamate receptor | DNA methylation |
|-----------------------------------------------------------|-------|--------------|-----------|------------------|---------------------|--------------------|-----------------|
| Depression-related genes in ACC (12 M)                    | 527   | 527          | 467       | 419              | 223                 | 354                | 481             |
| Depression-related genes in ACC (24 M)                    | 507   | 507          | 440       | 404              | 194                 | 325                | 439             |
| Depression-related genes in amygdala (12 M)               | 448   | 448          | 399       | 359              | 181                 | 291                | 396             |
| Depression-related genes in amygdala (24 M)               | 564   | 564          | 489       | 438              | 229                 | 367                | 499             |
| Anxiety-related genes in ACC (12 M)                       | 1918  | 1918         | -         | 1072             | -                   | 751                | 1354            |
| Anxiety related genes in ACC (24 M)                       | 1998  | 1998         | -         | 1104             | -                   | 759                | 1346            |
| Anxiety-related genes in amygdala (12 M)                  | 1706  | 1706         | -         | 992              | -                   | 646                | 1175            |
| Anxiety-related genes in amygdala (24 M)                  | 1991  | 1991         | -         | 1137             | -                   | 779                | 1394            |
| Cognitive dysfunction-related genes in hippocampus (12 M) | 920   | 920          | 749       | 651              | 320                 | 509                | 735             |
| Cognitive dysfunction-related genes in hippocampus (24 M) | 881   | 881          | 726       | 652              | 292                 | 471                | 702             |

**Supplementary Table 4.** Correlation analysis between the DEGs in the anterior cingulate cortex/amygdala and behavioral phenotypes from 2- and 12-month old mice.

|                                     | Gene            | Open field test       |                    |                   | Elevated plus-maze test |                     | Tail suspension test | Forced swimming test |
|-------------------------------------|-----------------|-----------------------|--------------------|-------------------|-------------------------|---------------------|----------------------|----------------------|
|                                     |                 | % distance in central | Entries in central | % time in central | % entries in open arms  | % time in open arms | Immobile time        | Immobile time        |
| Depression related DEGs in ACC      | <i>Esr1</i>     |                       |                    |                   |                         |                     | 0.902 (0.014)*       | 0.902 (0.008)**      |
|                                     | <i>Crhr2</i>    |                       |                    |                   |                         |                     | 0.927 (0.008)**      | 0.977 (0.001)**      |
|                                     | <i>Tgif1</i>    |                       |                    |                   |                         |                     | 0.848 (0.033)*       | 0.912 (0.011)*       |
| Anxiety related DEGs in ACC         | <i>Esr1</i>     | -0.856 (0.030)*       | -0.899 (0.015)*    | -0.768 (0.074)    | -0.909 (0.012)*         | -0.642 (0.169)      |                      |                      |
|                                     | <i>Crhr2</i>    | -0.716 (0.110)        | -0.876 (0.022)*    | -0.658 (0.155)    | -0.810 (0.051)          | -0.662 (0.152)      |                      |                      |
|                                     | <i>Tshr</i>     | -0.939 (0.006)**      | -0.931 (0.007)**   | -0.808 (0.052)    | -0.968 (0.001)**        | -0.833 (0.039)*     |                      |                      |
| Depression related DEGs in amygdala | <i>Vdr</i>      |                       |                    |                   |                         |                     | 0.886 (0.019)*       | 0.872 (0.023)*       |
|                                     | <i>Kif11</i>    |                       |                    |                   |                         |                     | -0.850 (0.032)*      | -0.823 (0.044)*      |
|                                     | <i>Pomc</i>     |                       |                    |                   |                         |                     | 0.778 (0.068)        | 0.674 (0.142)        |
| Anxiety related DEGs in amygdala    | <i>Bcl2l10</i>  | -0.858 (0.029)*       | -0.884 (0.019)*    | -0.879 (0.021)*   | -0.852 (0.031)*         | -0.647 (0.165)      |                      |                      |
|                                     | <i>Serpinf2</i> | 0.934 (0.006)**       | 0.886 (0.019)*     | 0.828 (0.042)*    | 0.852 (0.031)*          | 0.860 (0.028)*      |                      |                      |
|                                     | <i>Piwil4</i>   | 0.837 (0.038)*        | 0.944 (0.005)**    | 0.890 (0.017)*    | 0.795 (0.059)           | 0.810 (0.051)       |                      |                      |

Pearson's  $r$  values for the correlation are summarized and  $P$  values are in parentheses in the table. N = 3 biological repeats (3 mice)/age. \* $P < 0.05$ , \*\* $P < 0.01$ .

**Supplementary Table 5.** Correlation analysis between the DEGs in hippocampus and behavioral phenotype from 2- and 12-month old mice.

| Gene        | Y-maze spontaneous alternation test | Novel-object recognition test |                                | Morris water maze test        |                                |                                 |                                  |
|-------------|-------------------------------------|-------------------------------|--------------------------------|-------------------------------|--------------------------------|---------------------------------|----------------------------------|
|             | % spontaneous alternation           | Recognition index (after 3 h) | Recognition index (after 24 h) | Platform crossing (after 1 h) | Platform crossing (after 24 h) | Latency to platform (after 1 h) | Latency to platform (after 24 h) |
| <i>Plg</i>  | -0.892 (0.017)*                     | -0.956 (0.003)**              | -0.854 (0.030)*                | -0.889 (0.018)*               | -0.726 (0.102)                 | 0.804 (0.054)                   | 0.746 (0.088)                    |
| <i>Dbh</i>  | 0.884 (0.019)*                      | 0.855 (0.030)*                | 0.760 (0.080)                  | 0.799 (0.057)                 | 0.755 (0.082)                  | -0.672 (0.144)                  | -0.789 (0.062)                   |
| <i>Prph</i> | -0.756 (0.082)                      | -0.773 (0.071)                | -0.784 (0.065)                 | -0.869 (0.025)*               | -0.772 (0.072)                 | 0.764 (0.077)                   | 0.642 (0.101)                    |

Pearson's  $r$  values for the correlation are summarized and  $P$  values are in parentheses in the table.  $N = 3$  biological repeats (3 mice)/age. \* $P < 0.05$ , \*\* $P < 0.01$ .
